# Supplementary material for: Genetic structure of two sympatric gudgeon fishes (Xenophysogobio boulengeri and X. nudicorpa) in the upper reaches of Yangtze River Basin
Source: PeerJ. 2019 Aug 6;7:e7393. doi: 10.7717/peerj.7393 (PMC6688597; doi:10.7717/peerj.7393)
Supplement: Supplemental Information 14 — Raw data of Xenophysogobio boulengeri from five populations based 9 microsatellite loci.. [file peerj-07-7393-s014.xlsx]

## Sheet: Sheet1
	LT1-FAM（奇）蓝		LT2-TMRAM（奇）黑		LT3-FAM（偶）蓝		LT3-TMRAM（偶）黑		Xb1-HEX（偶）绿		Xb1-TMRAM（偶）黑		Xb2-FAM（奇）蓝		Xb2-HEX（偶）绿		Xb2-TMRAM（偶）黑
Xenophysogobio boulengeri-SSR-data
vs
npops=5
nloci=9
	LT-C5		LT-D2		LT-D7		LT-D8		Xb3		Xb2		Xb4		Xb11		Xb5
pop =JJ
JJ1	219	219	233	257	165	165	198	262	140	142	192	200	191	191	144	144	144	166
JJ2	219	219	245	269	209	229	210	262	132	140	168	176	179	188	146	146	164	166
JJ3	219	219	225	241	197	197	214	246	128	136	172	180	185	191	136	152	136	156
JJ4	219	219	249	277	209	221	198	254	128	130	170	176	185	188	148	148	116	148
JJ5	?	?	?	?	173	177	?	?	?	?	?	?	188	191	158	158	?	?
JJ6	216	219	237	237	213	221	202	202	134	156	196	198	188	188	148	156	146	172
JJ7	219	219	?	?	197	209	190	206	134	158	182	198	188	188	128	148	144	144
JJ8	219	219	?	?	197	221	270	278	134	138	174	196	182	185	146	146	166	168
JJ9	219	222	?	?	209	217	222	242	?	?	?	?	188	191	148	148	160	178
JJ10	219	222	249	253	209	217	222	242	156	158	184	190	188	191	148	148	160	178
JJ11	219	219	233	257	165	169	178	250	138	146	168	176	188	194	128	128	142	154
JJ12	?	?	?	?	213	241	266	266	132	136	170	170	185	191	146	146	142	146
JJ13	219	222	261	265	165	213	?	?	?	?	?	?	185	188	128	160	146	148
JJ14	219	222	?	?	?	?	?	?	138	142	178	178	191	191	130	154	134	160
JJ15	219	222	?	?	217	233	202	206	136	138	170	174	185	188	130	154	130	130
JJ16	?	?	?	?	165	209	186	194	132	134	?	?	185	185	126	134	126	134
JJ17	219	222	?	?	197	197	174	234	136	150	170	180	182	191	144	144	134	134
JJ18	219	219	?	?	165	165	206	222	134	136	168	176	188	191	134	160	158	158
JJ19	219	225	?	?	173	217	210	222	128	138	184	196	191	194	136	158	136	158
JJ20	219	219	?	?	165	193	238	238	132	132	186	196	185	191	126	152	170	172
JJ21	219	219	?	?	225	241	214	238	132	138	?	?	182	191	136	142	166	168
JJ22	216	219	265	269	161	185	194	222	132	132	168	176	185	191	140	156	160	162
JJ23	219	219	249	253	185	233	178	214	132	150	178	196	185	188	146	156	156	166
JJ24	219	222	241	257	209	233	190	222	132	134	168	168	185	185	138	138	196	202
JJ25	?	?	?	?	165	237	190	210	132	134	176	176	188	194	136	160	146	146
JJ26	219	219	229	261	197	209	222	230	142	144	170	176	191	191	150	160	148	148
JJ27	219	219	?	?	221	229	190	190	142	144	174	178	179	191	144	156	138	138
JJ28	219	219	?	?	201	205	194	194	134	136	168	168	185	191	140	158	?	?
JJ29	?	?	?	?	?	?	?	?	148	154	?	?	?	?	136	152	?	?
JJ30	219	222	?	?	201	233	214	262	134	148	168	200	182	191	152	152	130	136
JJ31	219	219	?	?	209	213	190	206	126	154	184	200	188	191	140	154	176	178
JJ32	219	219	237	245	161	205	198	230	132	132	168	180	185	194	136	142	132	132
JJ33	219	222	245	245	221	221	214	242	134	160	176	192	188	191	150	154	132	150
JJ34	219	219	261	293	205	209	182	190	132	154	178	182	191	191	126	148	170	176
JJ35	219	222	237	257	225	241	190	190	152	166	170	180	185	185	148	148	148	170
JJ36	219	219	257	285	185	201	250	250	134	146	168	186	185	191	136	160	130	138
JJ37	219	219	269	273	165	209	198	206	132	148	170	178	179	182	128	154	130	146
JJ38	216	219	253	261	165	221	206	230	132	132	172	180	179	188	134	160	138	188
pop =YB
YB1	219	222	261	273	233	245	206	226	132	132	168	180	179	191	140	148	170	188
YB2	219	219	241	269	205	205	186	230	132	154	176	176	185	185	154	158	148	148
YB3	?	?	?	?	189	201	218	222	126	126	?	?	?	?	?	?	?	?
YB4	219	222	233	245	221	245	206	242	132	138	170	178	191	191	140	160	178	180
YB5	219	222	237	261	161	221	218	242	132	142	176	180	191	191	152	152	160	166
YB6	219	219	229	253	201	201	194	206	134	148	178	196	182	185	140	140	152	168
YB7	216	219	245	261	201	233	222	230	134	134	178	180	179	185	150	166	158	158
YB8	216	219	241	277	165	193	170	226	132	136	180	202	188	197	144	150	172	174
YB9	222	222	249	249	201	221	198	218	132	134	176	176	182	191	132	154	134	138
YB10	219	219	257	265	225	225	206	222	138	156	176	180	179	185	138	152	154	162
YB11	219	219	237	253	209	217	178	198	134	136	176	190	188	188	132	132	166	172
YB12	219	219	253	273	205	225	202	214	132	142	174	196	179	188	144	144	132	166
YB13	219	219	253	257	197	201	234	234	132	138	174	182	188	191	150	156	144	164
YB14	219	222	225	277	181	221	218	230	132	142	184	192	185	185	126	158	142	178
YB15	219	222	233	269	217	217	214	262	132	152	168	176	185	185	158	162	172	174
YB16	219	222	225	233	201	209	210	230	132	132	176	196	185	191	126	140	170	174
YB17	219	219	233	273	165	165	194	198	134	134	?	?	182	185	128	136	150	150
YB18	219	222	237	257	193	201	166	206	132	150	?	?	185	188	144	144	154	154
YB19	216	219	253	261	225	237	198	210	138	144	168	196	182	191	132	142	162	190
YB20	?	?	?	?	165	165	222	226	126	126	?	?	?	?	132	146	?	?
YB21	219	219	?	?	249	249	202	202	132	156	170	178	182	194	148	156	166	170
YB22	219	222	237	265	165	193	174	178	132	132	178	180	182	194	144	166	124	148
YB23	219	222	237	269	225	253	226	234	132	144	170	180	191	191	138	160	170	172
YB24	219	222	233	257	165	229	186	218	132	136	188	190	188	191	128	152	144	170
YB25	219	219	261	269	201	245	254	274	128	132	176	178	185	191	140	144	142	166
YB26	219	219	253	269	201	233	178	198	132	142	176	176	194	197	?	?	192	192
YB27	222	222	237	253	185	205	194	198	132	134	180	186	179	182	144	156	144	148
YB28	219	219	249	253	165	169	218	250	136	156	168	176	185	185	140	148	148	156
YB29	219	222	229	273	185	213	218	230	130	152	?	?	185	185	130	144	124	134
YB30	?	?	?	?	?	?	?	?	?	?	?	?	182	182	?	?	?	?
YB31	216	219	253	269	221	221	194	218	134	138	194	194	185	191	148	152	156	158
YB32	219	219	253	265	213	229	174	218	128	156	202	206	185	185	132	150	142	142
YB33	219	222	245	249	169	213	210	226	138	160	186	190	191	191	148	152	146	150
YB34	222	222	?	?	165	237	214	258	132	140	168	178	185	191	140	152	154	160
YB35	219	222	245	265	217	217	190	218	130	138	168	176	191	191	148	160	128	150
YB36	219	222	233	237	209	217	214	246	128	132	170	176	191	191	128	160	162	168
YB37	216	222	253	269	201	225	214	282	132	136	168	176	185	185	144	162	154	164
YB38	219	219	221	241	225	229	230	230	136	144	176	180	188	194	146	146	130	146
YB39	216	219	241	245	209	221	198	246	?	?	?	?	191	191	146	150	136	148
pop =SF
SF1	219	222	249	273	165	165	194	214	138	146	170	208	179	182	128	152	148	158
SF2	219	219	253	265	205	205	186	222	132	138	170	178	188	191	150	156	118	132
SF3	219	222	253	253	165	233	198	218	128	134	178	192	179	191	126	150	144	160
SF4	219	219	237	269	209	217	202	242	136	144	170	180	185	185	148	160	168	168
SF5	219	222	233	241	185	209	174	266	146	150	168	188	182	194	146	152	134	150
SF6	219	219	249	249	177	201	202	222	136	136	170	172	188	188	126	148	172	174
SF7	213	219	237	245	193	205	190	210	130	136	168	174	185	191	136	150	130	160
pop =YS
YS1	219	225	253	253	165	209	202	230	128	156	196	208	182	185	150	154	154	162
YS2	222	222	241	249	209	229	202	246	138	158	172	178	179	188	146	146	182	184
YS3	219	219	253	253	185	213	202	226	128	128	176	184	179	191	160	160	196	198
YS4	219	222	245	269	165	165	170	218	136	148	168	178	182	191	148	154	142	146
YS5	216	219	245	249	165	245	182	214	130	134	168	196	191	191	154	154	150	162
YS6	219	219	245	273	189	189	218	254	132	138	174	178	185	185	158	162	174	176
YS7	219	219	249	249	209	217	190	222	132	138	170	174	188	191	152	164	132	144
YS8	219	225	241	273	181	181	186	202	134	148	170	172	185	188	140	150	126	158
YS9	216	219	237	273	193	237	202	214	128	136	174	200	188	191	136	154	142	154
YS10	219	219	245	245	165	225	210	230	136	136	174	180	182	185	156	156	156	190
YS11	219	219	249	261	165	197	198	206	138	156	168	176	188	188	126	136	156	160
YS12	216	222	?	?	165	221	?	?	138	144	170	198	182	185	132	164	156	156
YS13	219	219	?	?	205	205	?	?	138	154	172	178	185	188	132	136	?	?
YS14	219	222	245	249	?	?	?	?	132	142	194	198	188	188	158	158	?	?
YS15	219	222	249	269	217	229	178	226	132	142	168	180	185	188	148	174	160	160
YS16	?	?	249	249	193	205	?	?	?	?	168	196	182	182	?	?	?	?
YS17	219	222	253	281	209	229	194	210	132	156	170	174	185	185	142	148	154	166
YS18	219	219	221	257	221	221	186	206	134	134	180	196	185	191	128	134	140	144
YS19	219	219	273	281	201	225	190	286	146	170	174	196	191	191	132	146	194	196
YS20	219	222	245	245	225	245	210	218	128	176	176	182	188	191	142	158	190	192
YS21	219	222	241	249	165	205	190	202	132	132	178	194	185	185	142	150	176	178
YS22	219	219	261	269	185	201	218	250	132	176	170	170	191	194	134	134	144	144
YS23	219	225	229	241	213	225	226	238	136	136	180	206	185	191	142	148	196	198
YS24	219	222	?	?	165	225	218	258	128	152	170	176	179	182	156	160	142	150
pop =QW
QW1	219	219	225	265	197	205	182	222	134	148	168	192	185	191	140	166	152	156
QW2	219	219	245	257	205	221	194	242	132	138	180	214	188	191	154	154	166	168
QW3	219	219	237	245	209	241	210	262	134	142	180	200	185	188	126	160	196	198
QW4	219	222	233	253	229	241	214	246	132	138	168	176	185	191	134	148	144	152
QW5	219	219	245	249	165	241	206	222	132	136	172	208	185	197	148	158	140	148
QW6	222	222	233	241	197	213	190	222	132	132	180	194	185	191	148	148	142	148
QW7	219	219	245	245	197	213	218	218	138	146	170	196	185	191	152	152	128	154
QW8	219	222	245	249	197	201	190	230	138	172	174	196	185	191	140	140	130	134
QW9	216	219	253	261	197	209	222	258	136	136	178	198	?	?	140	146	140	146
QW10	219	219	241	249	209	233	210	238	?	?	?	?	179	185	126	136	132	154
QW11	216	219	249	269	177	213	190	202	132	132	178	182	182	185	154	158	?	?
QW12	228	231	?	?	185	245	?	?	?	?	?	?	188	188	?	?	?	?
QW13	219	219	?	?	205	237	190	222	132	136	196	202	188	188	140	148	130	158
QW14	222	222	249	261	165	237	230	230	132	138	178	180	179	182	140	150	176	178
QW15	222	222	265	265	233	237	238	290	146	166	174	176	185	191	150	150	132	138
QW16	216	219	233	245	209	241	190	210	130	150	176	178	179	191	126	136	174	176
QW17	222	222	245	269	205	205	206	218	128	132	174	190	185	200	142	148	154	156
QW18	219	222	237	265	209	213	186	202	132	148	170	180	185	185	128	156	162	164
QW19	219	219	229	269	165	201	278	294	128	146	178	180	179	185	128	152	180	182
QW20	219	222	233	241	213	229	198	202	132	138	176	202	188	191	134	164	132	162
QW21	219	219	249	269	165	201	222	274	134	134	174	212	185	191	134	146	130	130
QW22	219	222	237	241	165	197	182	222	134	134	168	204	185	188	126	126	140	162
QW23	219	222	?	?	197	213	206	210	138	138	170	180	182	191	148	156	148	160
QW24	219	222	257	281	165	165	218	246	140	140	190	198	188	188	144	144	186	188
QW25	219	219	253	261	165	213	214	282	132	146	186	198	191	191	148	160	176	178
QW26	219	222	277	285	193	201	182	182	134	152	180	180	179	197	162	162	170	172
QW27	219	222	225	257	209	209	166	194	136	156	168	180	185	188	152	160	126	134
QW28	219	222	241	261	165	225	206	226	132	132	170	170	191	191	152	158	172	174
QW29	219	222	237	269	197	229	190	218	128	150	180	202	188	191	148	154	166	168
QW30	216	222	?	?	165	241	186	226	128	132	174	192	185	185	148	148	158	158
QW31	216	219	249	269	217	237	186	194	134	154	184	196	191	191	146	162	?	?
QW32	219	222	?	?	165	229	?	?	132	138	168	174	182	188	134	144	134	144
QW33	213	216	249	265	193	213	210	246	138	168	180	186	179	185	140	148	182	184
QW34	219	222	?	?	221	237	194	202	132	132	168	174	182	188	152	152	142	154
QW35	219	219	?	?	201	221	?	?	138	154	178	198	185	188	140	140	?	?
QW36	219	219	261	269	217	229	202	226	132	132	180	182	188	191	150	162	128	144
QW37	219	219	245	269	173	221	222	222	132	132	172	180	179	191	152	160	152	162
QW38	219	222	269	269	165	193	166	218	132	158	180	184	185	191	156	166	138	160
QW39	219	219	233	273	205	209	182	214	132	152	170	180	185	191	128	152	148	154
